# Supplementary material for: The Heterodimeric ABC Transporter EfrCD Mediates Multidrug Efflux in Enterococcus faecalis
Source: PubMed Central journal article supplement (PMC4997860; doi:10.1128/aac.00661-16), 2016-08-22
Supplement: AAC.00661-16_zac009165484so1.pdf [file AAC.00661-16_zac009165484so1.pdf]

TABLE S1: Sequence identity matrix of the seven ABC exporters of *E. faecalis* V583, LmrCD of *L. lactis* IL1406, PatAB of *S. pneumoniae* R6, and TM287/288 of *T. maritima* MSB8.

|                    | Identity <sup>a</sup> |       |           |                    |                    |                    |           |           |           |           |
|--------------------|-----------------------|-------|-----------|--------------------|--------------------|--------------------|-----------|-----------|-----------|-----------|
|                    | LmrCD                 | PatAB | TM287/288 | EfrAB <sup>b</sup> | EfrCD <sup>c</sup> | EfrEF <sup>d</sup> | EF0942/41 | EF1592/93 | EF1733/32 | EF2593/92 |
| LmrCD              | 100.0                 | 57.0  | 36.1      | 34.0               | 58.6               | 32.2               | 31.8      | 30.9      | 28.5      | 34.1      |
| PatAB              | 57.0                  | 100.0 | 37.2      | 35.9               | 57.4               | 31.3               | 32.3      | 33.5      | 27.1      | 33.8      |
| TM287/288          | 36.1                  | 37.2  | 100.0     | 38.2               | 38.8               | 35.4               | 39.5      | 35.9      | 29.9      | 40.4      |
| EfrAB <sup>b</sup> | 34.0                  | 35.9  | 38.2      | 100.0              | 37.5               | 38.9               | 37.1      | 31.4      | 29.6      | 42.9      |
| EfrCD <sup>c</sup> | 58.6                  | 57.4  | 38.8      | 37.5               | 100.0              | 32.9               | 33.7      | 31.5      | 29.1      | 35.0      |
| EfrEF <sup>d</sup> | 32.2                  | 31.3  | 35.4      | 38.9               | 32.9               | 100.0              | 36.0      | 29.0      | 27.3      | 39.9      |
| EF0942/41          | 31.8                  | 32.3  | 39.5      | 37.1               | 33.7               | 36.0               | 100.0     | 29.2      | 29.8      | 41.1      |
| EF1592/93          | 30.9                  | 33.5  | 35.9      | 31.4               | 31.5               | 29.0               | 29.2      | 100.0     | 32.9      | 31.3      |
| EF1733/32          | 28.5                  | 27.1  | 29.9      | 29.6               | 29.1               | 27.3               | 29.8      | 32.9      | 100.0     | 29.4      |
| EF2593/92          | 34.1                  | 33.8  | 40.4      | 42.9               | 35.0               | 39.9               | 41.1      | 31.3      | 29.4      | 100.0     |

<sup>a</sup> Sequence identity matrix was generated using ClustalW

<sup>b</sup> EfrAB corresponds to EF2920/19

<sup>c</sup> EfrCD corresponds to EF0789/90

<sup>d</sup> EfrEF corresponds to EF2226/27

TABLE S2: Sequences of PCR primers for the generation of gene deletion knockouts in *E. faecalis*.

|                                      |                                                                                                                                                                                                                      |
|--------------------------------------|----------------------------------------------------------------------------------------------------------------------------------------------------------------------------------------------------------------------|
| <i>efrAB</i><br>( <i>ef2920/19</i> ) | 5'-FW: atatatGCTCTTtagtCCAGGTCCGCAATCCTGCTTC<br>5'-RV: gtattaccgatttcGAATAAAAAGAGGTCCGGACAGAAGCG<br>3'-FW: cccgacctctttttattcGAAATCGGTAATACAAGCTGTCTGGCTAG<br>3'-RV: tatataGCTCTTCatgcGTGACCGTGGGTAATAACGAGTGC       |
| <i>efrCD</i><br>( <i>ef0789/90</i> ) | 5'-FW: atatatGCTCTTtagtGACTGGGTGTTCTGGGATGAATGG<br>5'-RV: gccgtatattcctcCCTGCTTCTTCAGTGTTGGTCTGC<br>3'-FW: ctgaagaagcaggGAGGAATATACGGCAATTACGGCGC<br>3'-RV: tatataGCTCTTCatgcGAGCTAAACCGTTCGCTAAACCTGAC              |
| <i>efrEF</i><br>( <i>ef2226/27</i> ) | 5'-FW: atatatGCTCTTtagtGCTTAGCTACATTTGCTATTGCTAGTTCCT<br>5'-RV: gtcggagcttGGGTTCTGCGATTTGCAAACAG<br>3'-FW: gcaggaaccAAGCTCCGACTCTTTACGCCAG<br>3'-RV: tatataGCTCTTCatgcCGTCCAACCTGGTAAATTGCACCTAGGAC                  |
| <i>ef0942/41</i>                     | 5'-FW: atatatGCTCTTtagtCCGCAGCGACTGGAAGTCC<br>5'-RV: aataaccctgttcGGGCAAGACTAACTCGAAACAAGCTTC<br>3'-FW: gtagtcttgcccGAACAGGGTTATTATCGTGACCTTTACGAAGC<br>3'-RV: tatataGCTCTTCatgcCTTTAGCGACCAATATTGGCAGTGCTG          |
| <i>ef1592/93</i>                     | 5'-FW: atatatGCTCTTtagtGGTGTTTGGGAACATAATCATCCAGCG<br>5'-RV: agttgatcatgagCGACAAAAATAACAGCTAGCAGTAACTTATTC<br>3'-FW: gctgttattttgtcgCTCATGATCAACTAATGGCAAACATGCG<br>3'-RV: tatataGCTCTTCatgcCCGTCAGTCATTGAGTCTGCGAC  |
| <i>ef1733/32</i>                     | 5'-FW: atatatGCTCTTtagtCGAAGTCTTGTGGAAAGAGCAAATCCC<br>5'-RV: cataaaggccaccCGCTTTTTCTCCTAGATTATCCTATTCTCCC<br>3'-FW: gaggaaaagagcgGGTGGCCTTTATGCGGATATGTATCAG<br>3'-RV: tatataGCTCTTCatgcCCTAAACTTTCAGCGACACTTTCTGCAC |
| <i>ef2593/92</i>                     | 5'-FW: atatatGCTCTTtagtCGTTTCGGCGAGTCCGTCAATCC<br>5'-RV: cctcatcatgaattacCTCCTCCTTTTGTACTTATAAGCGCC<br>3'-FW: gcaaaaaggaggagGTAATTCATGATGAGGCTTCAGGAACCATAGTC<br>3'-RV: tatataGCTCTTCatgcGGTGGGTTTTACTTGTGCCAGTCC    |

TABLE S3: Sequences of PCR primers for the generation of FX-compatible knockout and complementation vectors.

|                                    |                                                                                                                  |
|------------------------------------|------------------------------------------------------------------------------------------------------------------|
| pCJK245_FX                         |                                                                                                                  |
| <i>ccdB</i> from pINIT_cat         | <i>ccdB</i> _XbaI_FW: atatatctagaGGCCGCTCTTCTAGTCGACCTG<br><i>ccdB</i> _NcoI_RV: atatatccatggCGGTGGCCGCTCTTCATGC |
| pMSP3535_FX_em and pMSP3535_FX_cat |                                                                                                                  |
| pMSP3535_FX_em                     | pMSP3535_FX_FW: CGCTCTTCCGCaTaaTCGCTCACTGAC<br>pMSP3535_FX_RV: atatatgctcttcTACTCATTGAGTGCCTCCTTATAAATTTATTTGTAG |
| pMSP3535_FX_cat                    | pMSP3535_FX_cat_FW: CGAACACGAACCGTCTTATCTCCCATTATATC<br>pMSP3535_FX_cat_RV: GGAGAACTTGGAAGTAGCATTAGAGAAAGC       |
| <i>cat</i> from pCJK245            | <i>cat</i> _FW: GCGAACGAAAAACAATTGCAAAAGCAGATTG<br><i>cat</i> _RV: GCACACGAAAAACAAGTTAAGGGATGC                   |

TABLE S4: Sequences of PCR primers for amplification of the open reading frames from genomic DNA of *E. faecalis* V583 and for the generation of the inactive E to Q mutant by mutating the conserved Walker B glutamate of the consensus site to a glutamine using QuikChange site-directed mutagenesis.

|                                                                  | Amplification of ORF from gDNA                                                                                                   | QuikChange of E to Q mutant                                                          |
|------------------------------------------------------------------|----------------------------------------------------------------------------------------------------------------------------------|--------------------------------------------------------------------------------------|
| <i>efrAB</i><br>( <i>ef2920/19</i> )                             | FW: atatatGCTCTTctagtAAGTTAATGTGGCGTTACACAATGCG<br>RV: tatataGCTCTTCatgcTTCCTCATAGTCGCCTTCTTCAGC                                 | FW: TTGATTTTAGATcAGGCGACTAGTTCAGTCG<br>RV: CGACTGAACTAGTCGCCTgATCTAAAATCAA           |
| <i>efrCD</i><br>( <i>ef0789/90</i> )                             | FW: atatatGCTCTTctagtGGTTCGGCGGCGGTGGCGTTCTGACCTTATTATTCAACACGCC<br>RV: tatataGCTCTTCatgcTTCAAAAACAAATTGATTTTTATAAAGTCCGC        | FW: GAATTATTAATTTTGGATcAAGCAACAAG<br>RV: CTTGTTGCTTgATCCAAAATTAATAATTC               |
| <i>efrCD</i><br>( <i>ef0789/90</i> )<br>with its native promoter | FW: atatatGCTCTTctagtCACTTTATGATAGGAAAACTTGTGAAAAATTAAGTGTTCG<br>RV: tatataGCTCTTCatgcTTCAAAAACAAATTGATTTTTATAAAGTCCGC           | FW: GAATTATTAATTTTGGATcAAGCAACAAG<br>RV: CTTGTTGCTTgATCCAAAATTAATAATTC               |
| <i>efrEF</i><br>( <i>ef2226/27</i> )                             | FW: atatatGCTCTTctagtAAATTAATGAAAGAGTTTATTAAAGAAAATAAATGGATTGTTCTTGCG<br>RV: tatataGCTCTTCatgcAGTGGTTTGAAATTGACTATTATATAAGCTGGCG | FW: CTCGATcAAGCAACTTCGAGTGTGGAC<br>RV: CGAAGTTGCTTgATCGAGAATAACAACGGG                |
| <i>ef0942/41</i>                                                 | FW: atatatGCTCTTctagtTTTGGTTTATTGAAATACGCAAAAAATTATCGAAAAACAA<br>RV: tatataGCTCTTCatgcTTGTGCTTTTTGATTAAACTGTGCTTCGTAAAG          | FW: GATGCTTATTTTAGATcAAGCGACCAGTTCAG<br>RV: CTGAACTGGTCGCTTgATCTAAAATAAGCATC         |
| <i>ef1592/93</i>                                                 | FW: atatatGCTCTTctagtAATAGTTTTGAATGGATTGGCAATATGCTAAAA<br>RV: tatataGCTCTTCatgcGCTCTTAATAAGTCGTATTGCGATTGATATAAATG               | FW: ATTTTAATTTTAGACcAAGCAACCTCCAGTAT<br>RV: ATACTGGAGGTTGCTTgGTCTAAAATTAATAAT        |
| <i>ef1733/32</i>                                                 | FW: atatatGCTCTTctagtTCCATATTCAAAAAATTAGGCTGGTTTTTTAAGC<br>RV: tatataGCTCTTCatgcAACTCCGTACTTTGTAAGTACTGATACATATCCGC              | FW: CCAAAATTTTAGTTTTAGATcAAGCAACCGCTAATATT<br>RV: ATATTAGCGGTTGCTTgATCTAAAATAAATTTGG |
| <i>ef2593/92</i>                                                 | FW: atatatGCTCTTctagtATTAAGTACTGCAACGGATGTCATTATGGTCGG<br>RV: tatataGCTCTTCatgcGGCTACTTCTTCTGAAAAGTACTGTTATATAAGTCAG             | FW: CGTTTTAATTTTGGATcAAGCCACCTCAAGTG<br>RV: CACTTGAGGTGGCTTgATCCAAAATTAATAACG        |

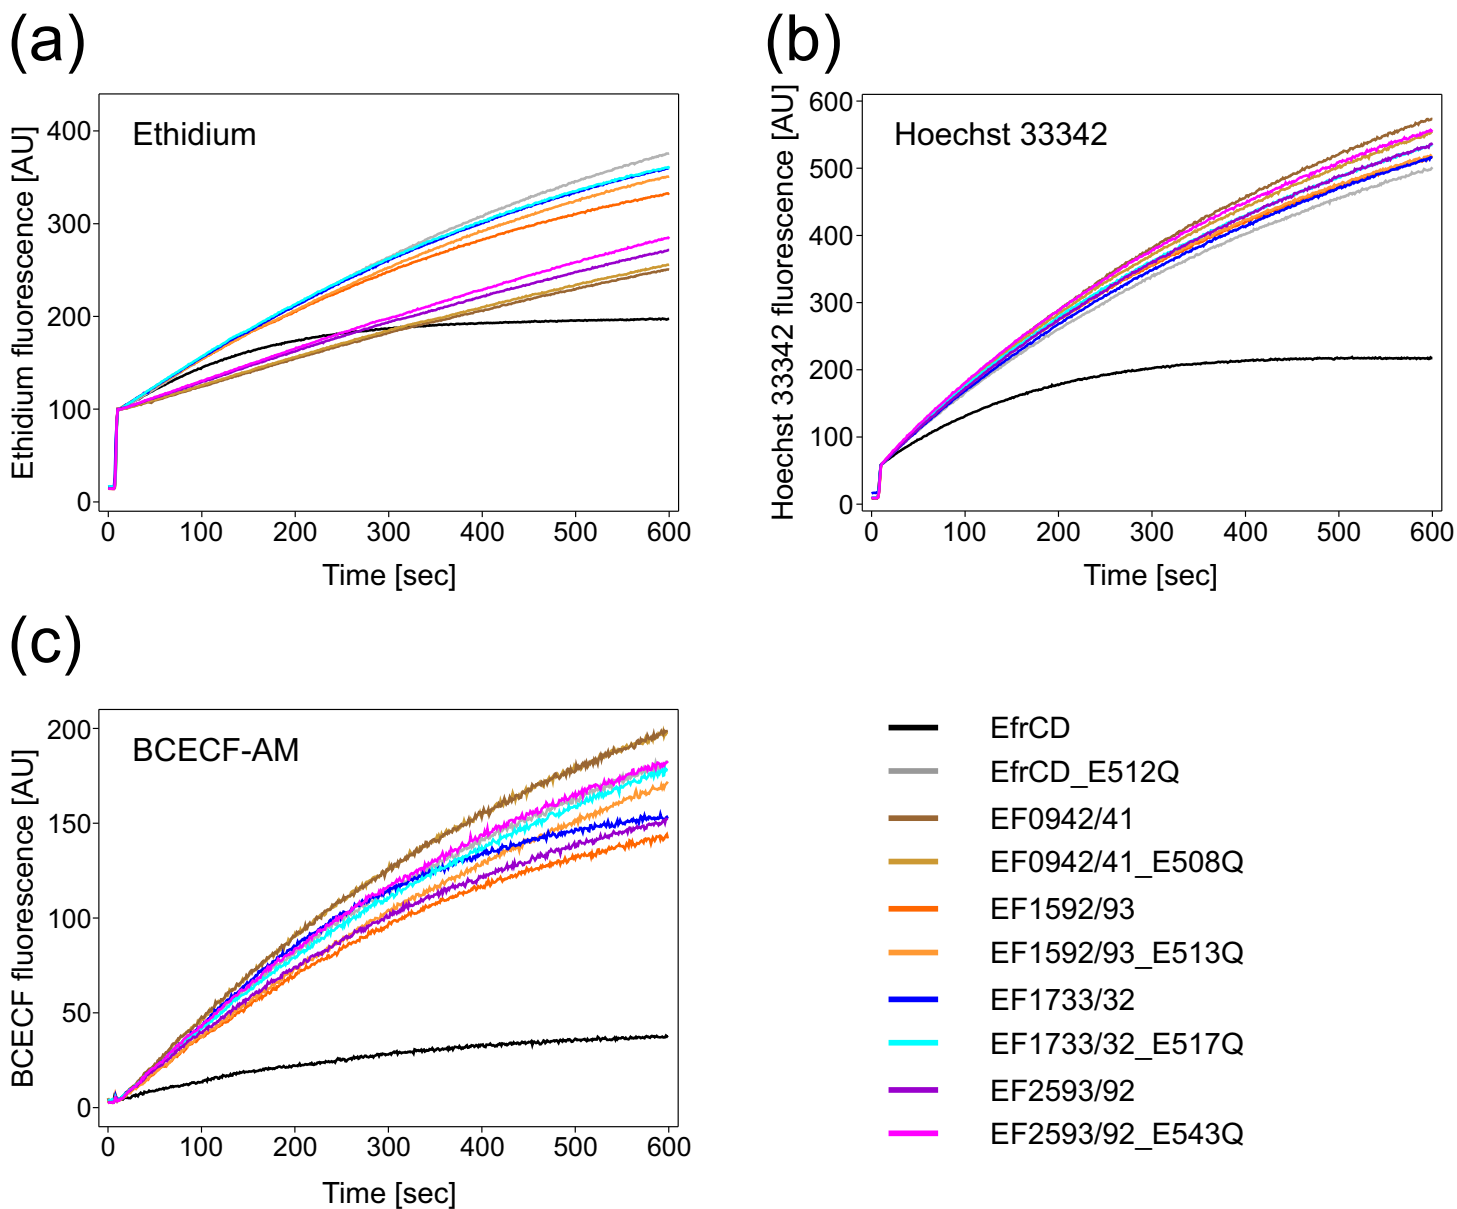

### Supplementary Figure 1

**Fluorescent dye transport mediated by EF0942/41, EF1592/93, EF1733/32 and EF2593/92.** Ethidium (a), Hoechst 33342 (b) and BCECF-AM (c) transport was measured as shown in Figure 1. *L. lactis* NZ9000  $\Delta lmrA\Delta lmrCD$  cells expressing wildtype or inactive E to Q mutant transporters of EF0942/41, EF1592/93, EF1733/32 and EF2593/92 were supplemented with ethidium, Hoechst 33342, or BCECF-AM and fluorescence was measured. The traces for EfrCD shown in Figure 1 are plotted for reference.

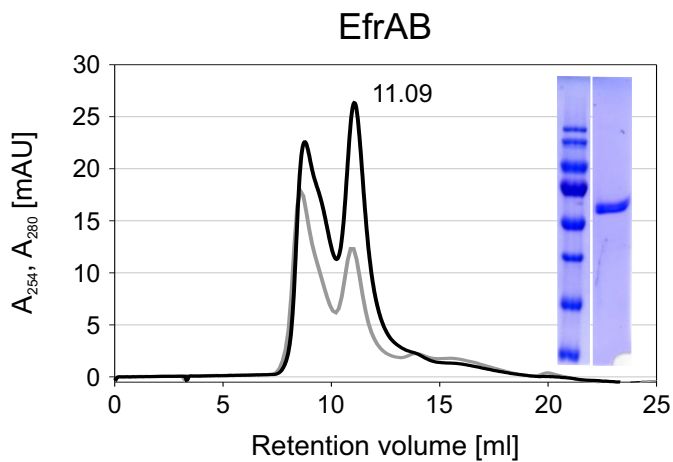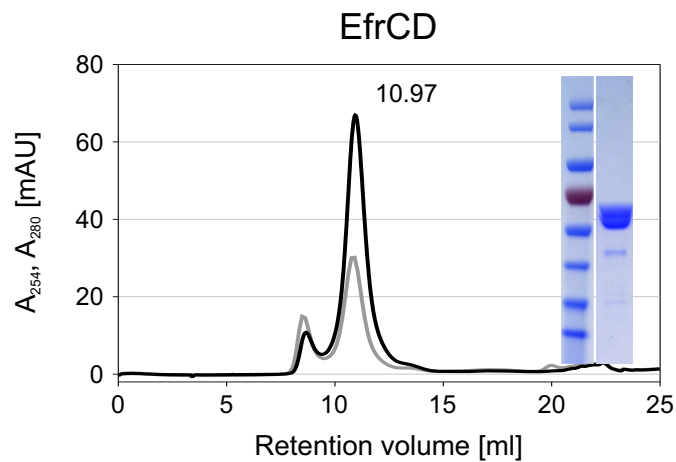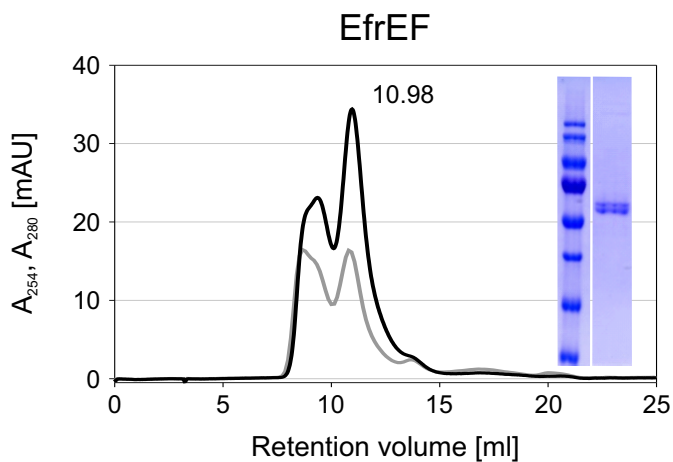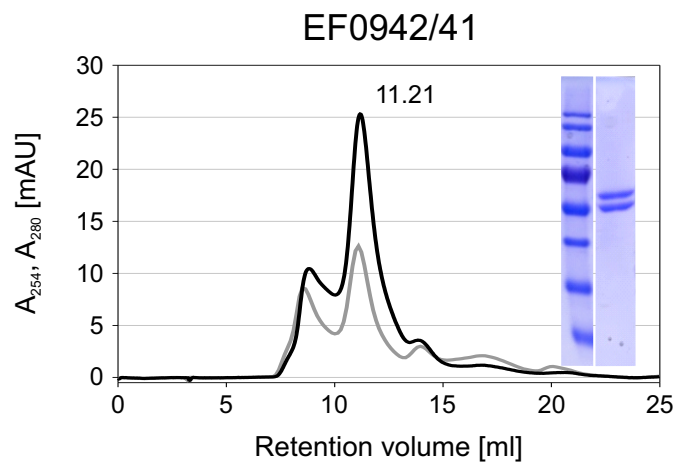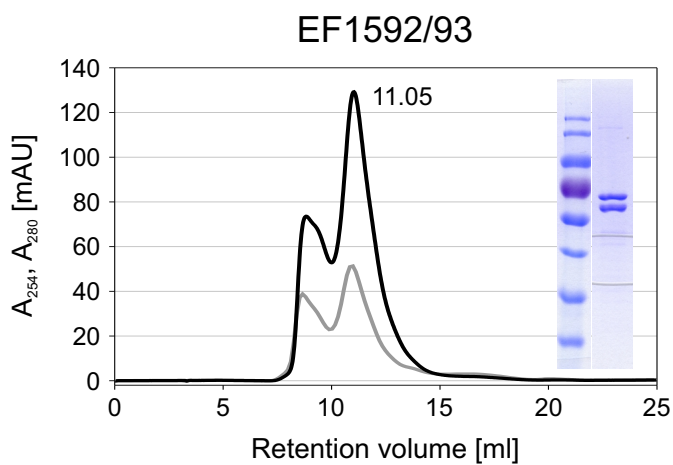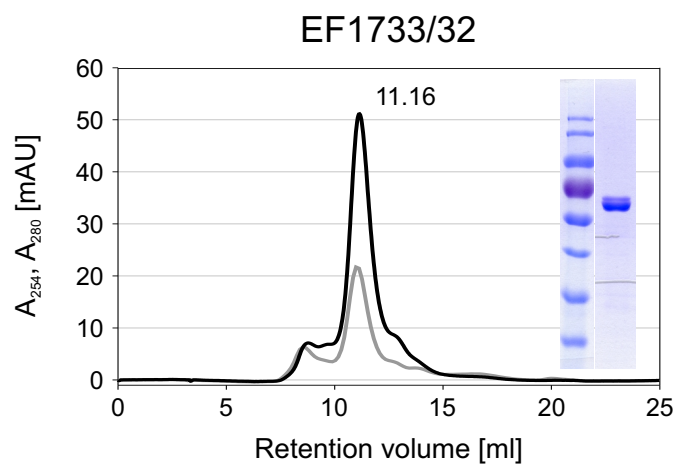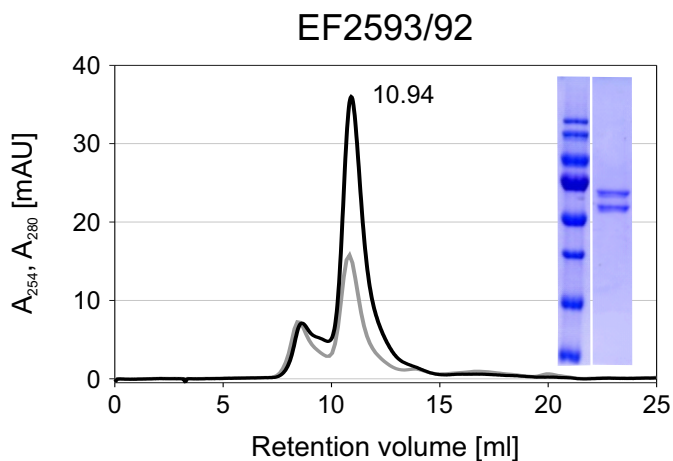

| [ $\mu$ g of protein/<br>liter of expression culture] |    |
|-------------------------------------------------------|----|
| EfrAB                                                 | 11 |
| EfrCD                                                 | 60 |
| EfrEF                                                 | 16 |
| EF0942/41                                             | 11 |
| EF1592/93                                             | 64 |
| EF1733/32                                             | 24 |
| EF2593/92                                             | 16 |

## Supplementary Figure 2

**SEC profiles of purified enterococcal ABC exporters.** The proteins were expressed in and purified from *L. lactis*. Size-exclusion chromatography using a Superdex 200 increase 10/300 GL column was performed in 20 mM Tris/HCl pH 7.4, 150 mM NaCl and 0.03%  $\beta$ -DDM. The peak eluting at around 11 ml retention volume corresponds to the size of typical heterodimeric ABC exporters.  $A_{280}$  is shown in black and  $A_{254}$  in gray. Peak fractions used for ATPase activity measurements were analyzed by SDS-PAGE and shown as insets. The protein yields contained in the respective 11 ml peak fractions (0.5 ml) were normalized to  $\mu\text{g/liter}$  of expression culture and listed in the table.





### **Supplementary Figure 3**

**Alignment of TMDs for homology model of EfrCD.** Transmembrane domains (TMDs) of bacterial ABC exporters were aligned using MAFFT for model building.

*EF0789* VEFDHVSFRYP-GDEEDTLKDISFSISIQPGEMIGIVGATGAGKSTLAQLIPRLFDPEEGKIEVGGVDLREVNHSRLKTVSVFLQKAILFSGTIAQNLRHGKR-DASEADMERASGGIAQAKFEIEKL  
*PatA* LSFENVLFTYP-MDKPEMLKDVSTFTEPGQMVGVGATGAGKSTLAQLIPRLFDPEQGAIKIGGKDIRVSEGLTRKTVSVIVLQRAILFSGTIADNLRQGGK-NATLFEMERAANIAQASEFIHRM  
*LmrC* VKFDHVSFSYP-NDEEPTLKDISEFEVAGOMVGVGATGAGKSTLAQLIPRLFDPEEGTVSVGGKDLTRVSRGTLKRNISIVLQKAILFSGTIAGNIKQGGK-DATDEEMTRAQIQAAEFITTK  
*EF0942* ITFDHVDFRYE-DEAGLALENINFTIPEKGSILGIIPTGSGKSTLIQLIPRFYDVSAGNLFINGVNRDWFLLTLRQQVASVPCAVLFTGTIRENLQWGF-NATDEDCWEALAIACKEFVQQL  
*EF2593* LAFEHVNRYRQ-HAENLALEDIDFSAKSGETVAIIGGTGSGKSTLMLNLPRLIDPERGRVEYDELDRVTVKLKLDRGHISAVPQETVLFSGTIKENLKWGRE-DATDEEIVAAKIAQHDFIISL  
*EF2920* LEFKNVTFAYPGHAESEPVLRNVSFKASPGETVAFIGSTGSGKSTLIQLIPRFYDVSSEGEILLDGVNVVEYKLSALRNKIYIPIKALLFTGTIADNRYGKE-DATLEEMERADIAQATEFVQSK  
*TM\_0287* VSFENVEFRYF-ENTDPVLSGVNFSVKGSLVAVLGETGSGKSTLMLNLPRLIDPERGRVEYDELDRVTVKLKLDRGHISAVPQETVLFSGTIKENLKWGRE-DATDEEIVAAKIAQHDFIISL  
*EF2226* ICFDHVTFQYT-ETADPVLBNVSFVIEPKGKTAIVGATGAGKSTLVLKLLRINEVTAQTISMSGDIRSLSQQTIRQVISVVPKAFILFSGTILSNLLMGNA-KATTEEIRTALETQSSSEFDDSL  
*EF1592* VTFDHVSFHFSDDEPETPILSDVSFSAPKGETIIGLGETGSGKSTLMLNLPRLIDPERGRVEYDELDRVTVKLKLDRGHISAVPQETVLFSGTIKENLKWGRE-DATLEEIVAAKIAQHDFIISL  
*EF0790* VALNHVVFQYN--PETPVLKDVSIHVDKEMVALVGPVSGKSTLMLNLPRLIDPERGRVEYDELDRVTVKLKLDRGHISAVPQETVLFSGTIKENLKWGRE-DATLEEIVAAKIAQHDFIISL  
*LmrD* IQENLDFEYL--PGKPVLLKKNVDVKKQOMVALVGPVSGKSTLMLNLPRLIDPERGRVEYDELDRVTVKLKLDRGHISAVPQETVLFSGTIKENLKWGRE-DATLEEIVAAKIAQHDFIISL  
*PatB* VEISHIDFSYL--PDKPILKDVSIASAEKGMVAUVGPTGSGKSTLMLNLPRLIDPERGRVEYDELDRVTVKLKLDRGHISAVPQETVLFSGTIKENLKWGRE-DATLEEIVAAKIAQHDFIISL  
*EF0941* VEFKVDVFSYT--PTRPLIENFNLIAEPGETIAIVGRGAGKSTLMLNLPRLIDPERGRVEYDELDRVTVKLKLDRGHISAVPQETVLFSGTIKENLKWGRE-DATLEEIVAAKIAQHDFIISL  
*EF2227* IEFKNVQFGYT--PEKILMKNVDFSVQPKKTVAVIGPTGAGKSTLMLNLPRLIDPERGRVEYDELDRVTVKLKLDRGHISAVPQETVLFSGTIKENLKWGRE-DATLEEIVAAKIAQHDFIISL  
*EF2592* VSEFHVAFGYS--PEKLLMKDFNLNVKPGEMVAIVGPTGAGKSTLMLNLPRLIDPERGRVEYDELDRVTVKLKLDRGHISAVPQETVLFSGTIKENLKWGRE-DATLEEIVAAKIAQHDFIISL  
*EF2919* VEFENVVFSYD--PEKPLIRNLFKVDAGOMVAIVGPTGAGKSTLMLNLPRLIDPERGRVEYDELDRVTVKLKLDRGHISAVPQETVLFSGTIKENLKWGRE-DATLEEIVAAKIAQHDFIISL  
*TM\_0288* IEFKNVWFSYD--KKKPVLLKKNVDVKKQOMVALVGPVSGKSTLMLNLPRLIDPERGRVEYDELDRVTVKLKLDRGHISAVPQETVLFSGTIKENLKWGRE-DATLEEIVAAKIAQHDFIISL  
*EF1593* VDFQHVYFRYE--EGKNILTDVSFHTPEQOTIALVGPVSGKSTLMLNLPRLIDPERGRVEYDELDRVTVKLKLDRGHISAVPQETVLFSGTIKENLKWGRE-DATLEEIVAAKIAQHDFIISL  
*SAV1866* IDIDHVSFQYN-DNEAPILKKNVDVKKQOMVALVGPVSGKSTLMLNLPRLIDPERGRVEYDELDRVTVKLKLDRGHISAVPQETVLFSGTIKENLKWGRE-DATLEEIVAAKIAQHDFIISL  
*VC\_MsbA* IEFKRVVFSYD--GKNEVLKKNISFVANEGETVALVGPVSGKSTLMLNLPRLIDPERGRVEYDELDRVTVKLKLDRGHISAVPQETVLFSGTIKENLKWGRE-DATLEEIVAAKIAQHDFIISL  
*EC\_MsbA* VDFKVDVFTYQ-GKEKPALSHVSFSTPQKGTVALVGRSGSGKSTLMLNLPRLIDPERGRVEYDELDRVTVKLKLDRGHISAVPQETVLFSGTIKENLKWGRE-DATLEEIVAAKIAQHDFIISL  
*ST\_MsbA* VEFKRVVFSYD--GKNEVLKKNISFVANEGETVALVGPVSGKSTLMLNLPRLIDPERGRVEYDELDRVTVKLKLDRGHISAVPQETVLFSGTIKENLKWGRE-DATLEEIVAAKIAQHDFIISL  
*EF1733* ISMKIDVFSYP-KEETVALENQFSLQGETIIGVIGKTGAGKSTLMLNLPRLIDPERGRVEYDELDRVTVKLKLDRGHISAVPQETVLFSGTIKENLKWGRE-DATLEEIVAAKIAQHDFIISL

*EF0789* AEGYDAPVEERNNSFGGQKORLSITRGVIGEPKILILDDSTSDALDARERLVREALDKELKETTIVIAQKISSVVHADRIILVLDNGRLVGGEGTHEELAAT-NEVVOEIVETQKCKEEA-----  
*PatA* EKTTFEAPVEERGNTNFGGQKORMSIAIRGIVSNRILIFDDSTSDALDAKSERLVREALNKDLKGTITIIIAQKISSVVHADRIILVLDNGRLVGGEGTHADLVAN-NAVYREIVETQK-----  
*LmrC* DGQYSEVEVEERNNSFGGQKORLSITRGVVKNEPVLILDDSTSDALDAKSEKLVREALNKELKETTIIIAQKISSVVHADRIILVLDNGRLVGGEGTHQELVAE-NKIVQEIYDQKQED-----  
*EF0942* DQGLDTPVNEGGKNSFGGQKORLTIARALIRKPHLLILDDSTSDALDYQDLNLRALQKERAETVILISQVSSSIATANQILVLDGKAVAGLTHEELLTS-SKEQOEIVASQEEETHAN----  
*EF2593* AEGLDSHVEGGGNSFGGQKORLTIARALVKEADVVVFDSSFDALDFKIDANLRKALKEQMTDAIVVLAQEVSTVMEASTILVLDGKLVGKCTHEELLAN-NQTYQEIIVHSQLEEDLA----  
*EF2920* PQGYDEPLSGGNTNFGGQKORLTIARAIIRNPEIYIFDSSFDALDYQDLNLRARLKKETTESVILVIAQVSGTIMHADRIIVLNEGDDVVGIGTHRELLLET-CEIYDIASQLESEELA----  
*TM\_0287* PEGYDVRVERGGRNFGGQKORLSIARALVKKPKVILDDSTSDVDEITEKRILDLGKRYTKGCTTIIIAQKISSVVHADRIILVLDGKAVAGLTHEELLTS-SKEQOEIVASQEEETHAN----  
*EF1592* PQGIESFVAQGGNSYSGGQKORMCTARALIKADVYIFDSSFDALDYKIDALRAALHAQMSDKTLLVIAQRLSTIMNADNIVLDEGRIVDQGTADLLTT-NSYVQDFAKSQGILEK-----  
*EF0790* PEGYAIIVGERGVGLSGGQKORLSIARALTKDPAILILDDTTSVDMETESKIQKELGRLTEKKTTFIIAHRISVREANLILMMEKGRVVEGTHSELVEQ-KGKVFVYQKGLGTLKEGESRG  
*EF2227* EQGYDEITTEENNLFTGOKQLVSIARTIITNPELILDEATSNVDITVEAKIQKAMDEAIKGRTSFVIAHRLKTIILNADRIIVLRDGEVIEEGNHHELVEQ-DGFVYAEVYKNOVFVE-----  
*LmrD* PDKYETHVSDDESFSVGGQKQISARTIITNPELILDEATSNVDITVEEQIQWAMEAAIAGRTSFVIAHRLKTIILNADKIVLVLDGKAVAGLTHEELLTS-SKEQOEIVASQEEETHAN----  
*PatB* PDKYDILDDQDQISFAGQKQLSIARTIMISNPPMILDEATSNVDITVEEQIQWAMEAAIAGRTSFVIAHRLKTIILNADQITVLKDGVEIERNHHELLKL-GGFVYSELVHNOVFVE-----  
*EF0941* PQGLDTEIGSQVKISGQORQMTIARTIMISNPPMILDEATSNVDITVEEQIQWAMEAAIAGRTSFVIAHRLKTIILNADQITVLKDGVEIERNHHELLKL-GGFVYSELVHNOVFVE-----  
*EF2227* PQGYDITISENGALSGGQOQLTIARTIILANPPVILDEATSNVDITVEEQIQWAMEAAIAGRTSFVIAHRLSTIENADLILVMKNGDIEKGTQHELLQA-PTLVASLNSQFQTT-----  
*EF2592* PEGYQITLNEASNISQGORLTIARAFLANPDLILDEATSNVDITVEEQIQWAMEAAIAGRTSFVIAHRLSTIENADLILVMKNGDIEKGTQHELLQA-PTLVASLNSQFQTT-----  
*EF2919* PDGYEMEINSEGDVNSLQKOLLTIARAVISDEKILILDEATSNVDITVEEQIQWAMEAAIAGRTSFVIAHRLSTIENADLILVMKNGDIEKGTQHELLQA-PTLVASLNSQFQTT-----  
*TM\_0288* PEGYEVLTLDNGEDLSQGOROLLTIARAFLANPKILILDEATSNVDITVEEQIQWAMEAAIAGRTSFVIAHRLSTIENADLILVMKNGDIEKGTQHELLQA-PTLVASLNSQFQTT-----  
*EF1593* KDGYEIVVEERGSTLSAGORQLISFARALLADEKILILDEATSNVDITVEEQIQWAMEAAIAGRTSFVIAHRLSTIENADLILVMKNGDIEKGTQHELLQA-PTLVASLNSQFQTT-----  
*SAV1866* PQGYDEVEGERGVKLSGGQKORLSIARTIPLNPELILDEATSDLDSESIICEALDVLSKDRITLIVAHRLSTIENADLILVMKNGDIEKGTQHELLQA-PTLVASLNSQFQTT-----  
*EF1733* PNTHAKVIERGASYSQGORQLISPARTIVTPKILVLDDEANIDTEPEGLICEGLAKMRCRTIITIAHRLSTIENADLILVMKNGDIEKGTQHELLQA-PTLVASLNSQFQTT-----  
*VC\_MsbA* PQGLDTEVIGENGTSLSGGQKORLTIARALLRDPVILILDEATSDLDSESERAIQALDELQKNRTSLVIAHRLSTIEQADEIVVVEDEGIIERGRHADLLAQ-DGAVACLHRIQFGE-----  
*EC\_MsbA* DNGLDTEVIGENGVLLSGGQKORLTIARALLRDPVILILDEATSDLDSESERAIQALDELQKNRTSLVIAHRLSTIEQADEIVVVEDEGIIERGRHADLLAQ-DGAVACLHRIQFGE-----  
*ST\_MsbA* DNGLDTEVIGENGVLLSGGQKORLTIARALLRDPVILILDEATSDLDSESERAIQALDELQKNRTSLVIAHRLSTIEQADEIVVVEDEGIIERGRHADLLAQ-DGAVACLHRIQFGE-----  
*EF1733* PEGYDVMVERGVLSGGQKORLSIARALIVEEELLILDDALSADAKTEEAILSNLKEITRQEKTTIIAHLSSVMHAKELVLVDEGKIITERGTHPELLAQ-KGVYQRMVEKQLEAKIEGSES

## Supplementary Figure 4

**Alignment of NBDs for homology model of EfrCD. Nucleotide binding domains (NBDs) of bacterial ABC exporters were aligned using MAFFT for model building.**
